# Supplementary material for: Diruthenium σ-alkynyl complexes as potential building blocks for heterometallic molecular rods
Source: Royal Society of Chemistry journal article supplement (doi:10.1039/b111068n), 2002-01-01
Supplement: b111068n.doc [file b111068n.doc]

**Diruthenium -alkynyl complexes as potential building blocks for heterometallic molecular rods**

**by Jing-Lin Zuo, Eberhardt Herdtweck and Fritz E. Kühn***

**Synthesis and characterization of compounds 1 and 2:**

An equimolar amount of *n*-BuLi was added dropwise to the solution of 4-ethynylpyridine (135.0 mg, 1.31 mmol) in 30 ml dry THF at -78 C under argon. 200 mg Ru2(form)4Cl (0.18 mmol) was added and the mixture was reacted at -78 C for 3 h and then slowly brought to room temperature. Stirring was continued for 24 h and then the reaction mixture was exposed to air for another 24 h. The purple residue was dissolved in CH2Cl2 and chromatographed on neutral Al2O3, eluting with CH2Cl2 to afford **1** (164.0 mg, 70%). IR (KBr, cm-1) 2097, 2064, 1503, 1214, 817. Ana. Calc. for C74H68N10Ru2: C, 68.39, H; 5.27; N, 10.78. Found C, 68.11; H, 5.10; N, 10.49. FAB-MS: 1300.2, 1198.2, 1096.2. Using Ru2(dpf)4Cl as starting material, the purple complex 2 was obtained. IR (KBr, cm-1) 2099, 2062, 1486, 1212, 696. Ana. Calc. for C66H52N10Ru2: C, 66.76, H; 4.41; N, 11.79. Found C, 66.37; H, 4.69; N, 11.45. FAB-MS: 1187.1, 1085.1, 983.1.
